# Supplementary material for: Effect of the Coupling Agent (3-Aminopropyl) Triethoxysilane on the Structure and Fire Behavior of Solvent-Free One-Pot Synthesized Silica-Epoxy Nanocomposites
Source: MDPI journal article supplement (doi:10.3390/polym14183853), 2022-09-15
Supplement: s1 [file s1]

## Supplementary material

# Effect of the Coupling Agent (3-aminopropyl) triethoxysilane on the Structure and Fire Behavior of Solvent-Free One-Pot Synthesized Silica-Epoxy Nanocomposites

Francesco Branda <sup>1,\*</sup>, Dambarudhar Parida <sup>2</sup>, Robin Pauer <sup>3</sup>, Massimo Durante <sup>1</sup>, Sabyasachi Gaan <sup>4</sup>, Giulio Malucelli <sup>5</sup>, Aurelio Bifulco <sup>1,\*</sup>

<sup>1</sup> Department of Chemical Materials and Industrial Production Engineering (DICMaPI), University of Naples Federico II, Piazzale Vincenzo Tecchio 80, 80125 Fuorigrotta, Naples, Italy

<sup>2</sup> Sustainable Polymer Technologies (SPOT) Team, Flemish Institute for Technological Research (Vito N.V.), Boeretang 200, 2400 Mol, Belgium

<sup>3</sup> Advanced Materials and Surfaces, Empa, Swiss Federal Laboratories for Materials Science and Technology, CH-8600 Dübendorf, Switzerland

<sup>4</sup> Laboratory for Advanced Fibers, Empa, Swiss Federal Laboratories for Materials Science and Technology, Lerchenfeldstrasse 5, 9014 St. Gallen, Switzerland

<sup>5</sup> Department of Applied Science and Technology, Politecnico di Torino, Viale Teresa Michel 5, 15121 Alessandria, Italy

\* Correspondence: branda@unina.it (F.B.); aurelio.bifulco@unina.it (A.B.); Tel.: +39-081-768-2412 (F.B.); +39-081-768-2413 (A.B.)

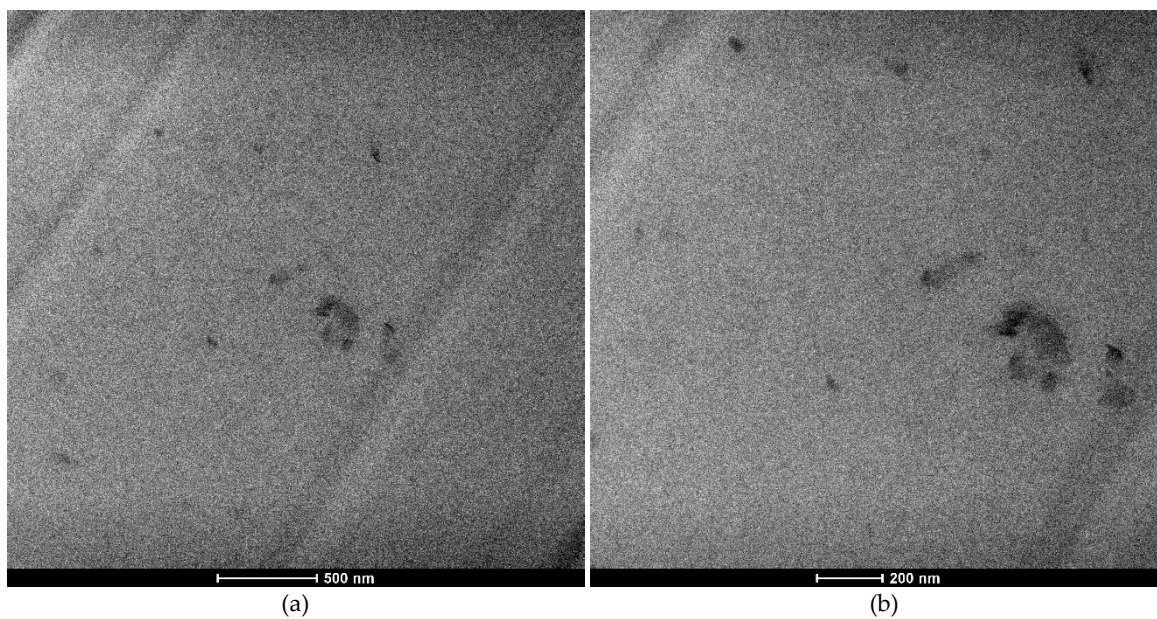

**Figure S1.** Low-resolution TEM micrographs of EPO\_6%Si\_2.32 at different magnifications.

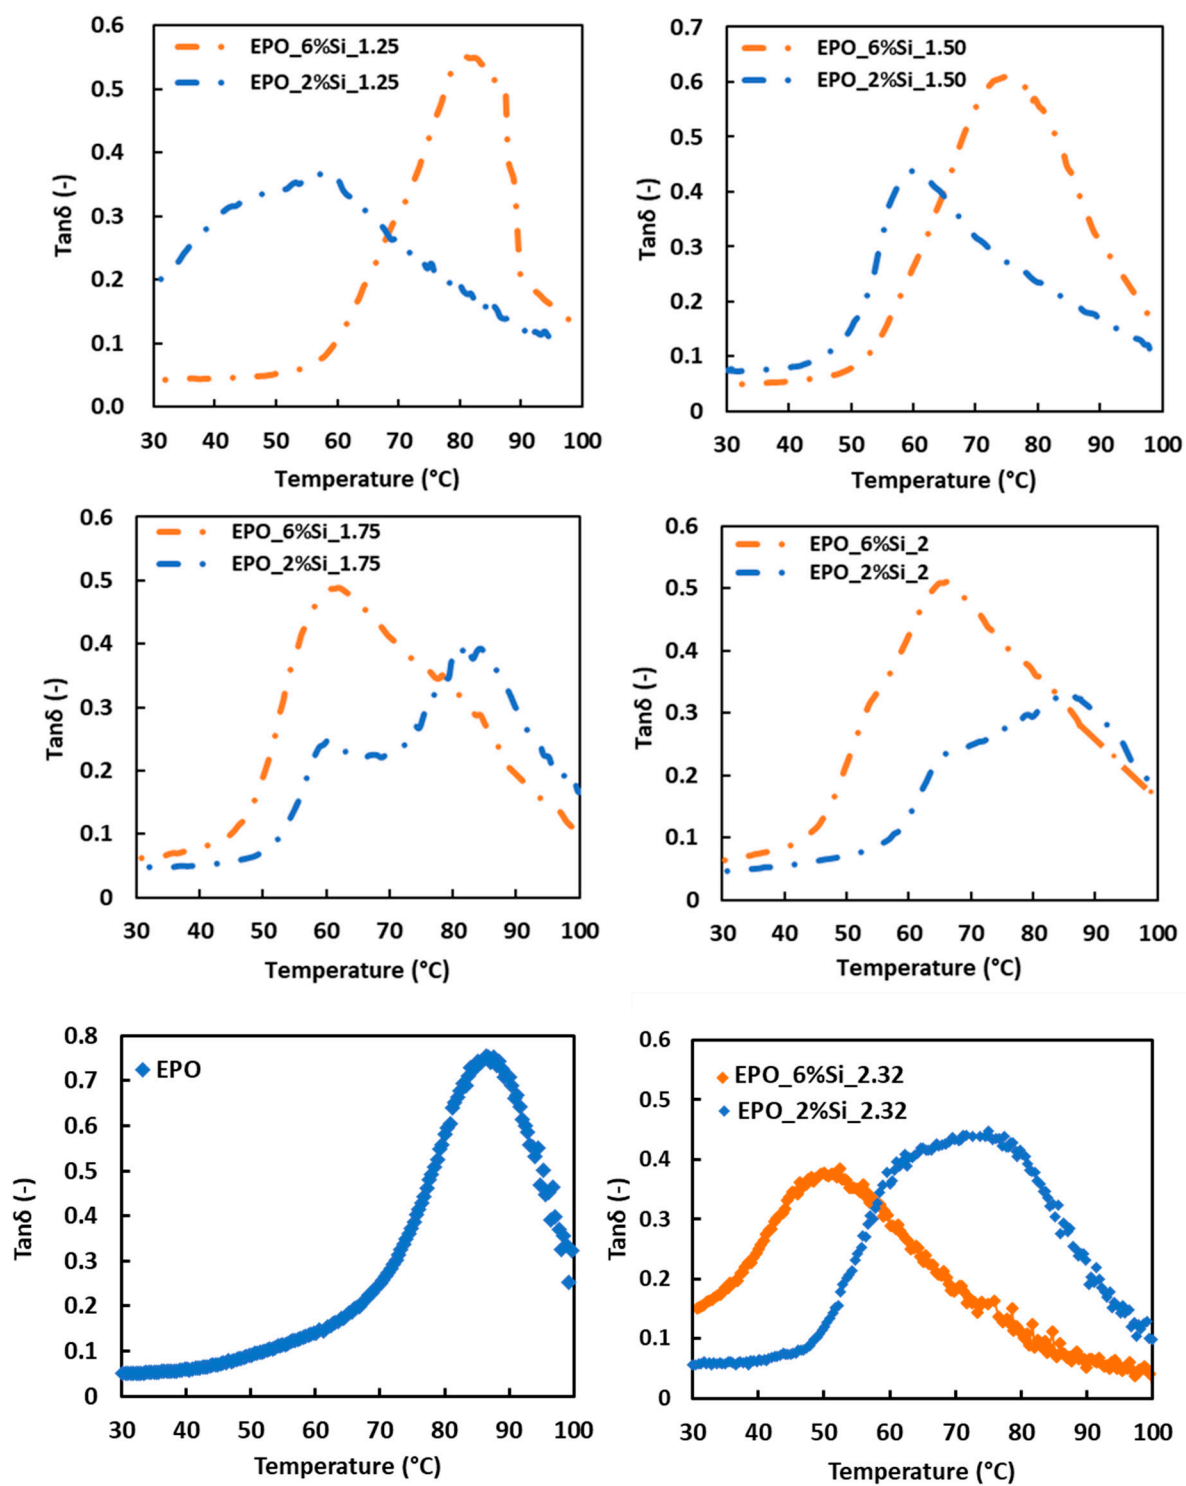

Figure S2. Tanδ vs. temperature curves of the investigated samples.

**Table S1.** TGA analysis of all samples (TEOS/APTS=2.32) in air and N<sub>2</sub>. T<sub>5%</sub>, T<sub>10%</sub> and T<sub>50%</sub> are the temperatures at which 5 wt.%, 10 wt.% and 50 wt.% losses were recorded, respectively. T<sub>peak</sub> is the temperature, at which the weight loss rate reached a maximum; the residues at T<sub>peak</sub> and 800 °C are also reported.

| Sample               | T <sub>5%</sub><br>(°C) | T <sub>10%</sub><br>(°C) | T <sub>50%</sub><br>(°C) | T <sub>peak</sub><br>(°C) | Residue at<br>T <sub>peak</sub><br>(%) | Residue at<br>800°C<br>(%) |
|----------------------|-------------------------|--------------------------|--------------------------|---------------------------|----------------------------------------|----------------------------|
| <i>N<sub>2</sub></i> |                         |                          |                          |                           |                                        |                            |
| EPO                  | 295                     | 347                      | 381                      | 370                       | 65.6                                   | 8.42                       |
| EPO_2%Si_2.32        | 213                     | 288                      | 384                      | 363                       | 72.9                                   | 9.61                       |
| EPO_6%Si_2.32        | 239                     | 300                      | 404                      | 377                       | 66.6                                   | 16.7                       |
| <i>Air</i>           |                         |                          |                          |                           |                                        |                            |
| EPO                  | 280                     | 352                      | 358                      | 365                       | 84.6                                   | 0.75                       |
| EPO_2%Si_2.32        | 231                     | 300                      | 398                      | 370                       | 73.3                                   | 3.37                       |
| EPO_6%Si_2.32        | 185                     | 243                      | 407                      | 369                       | 71.2                                   | 3.46                       |

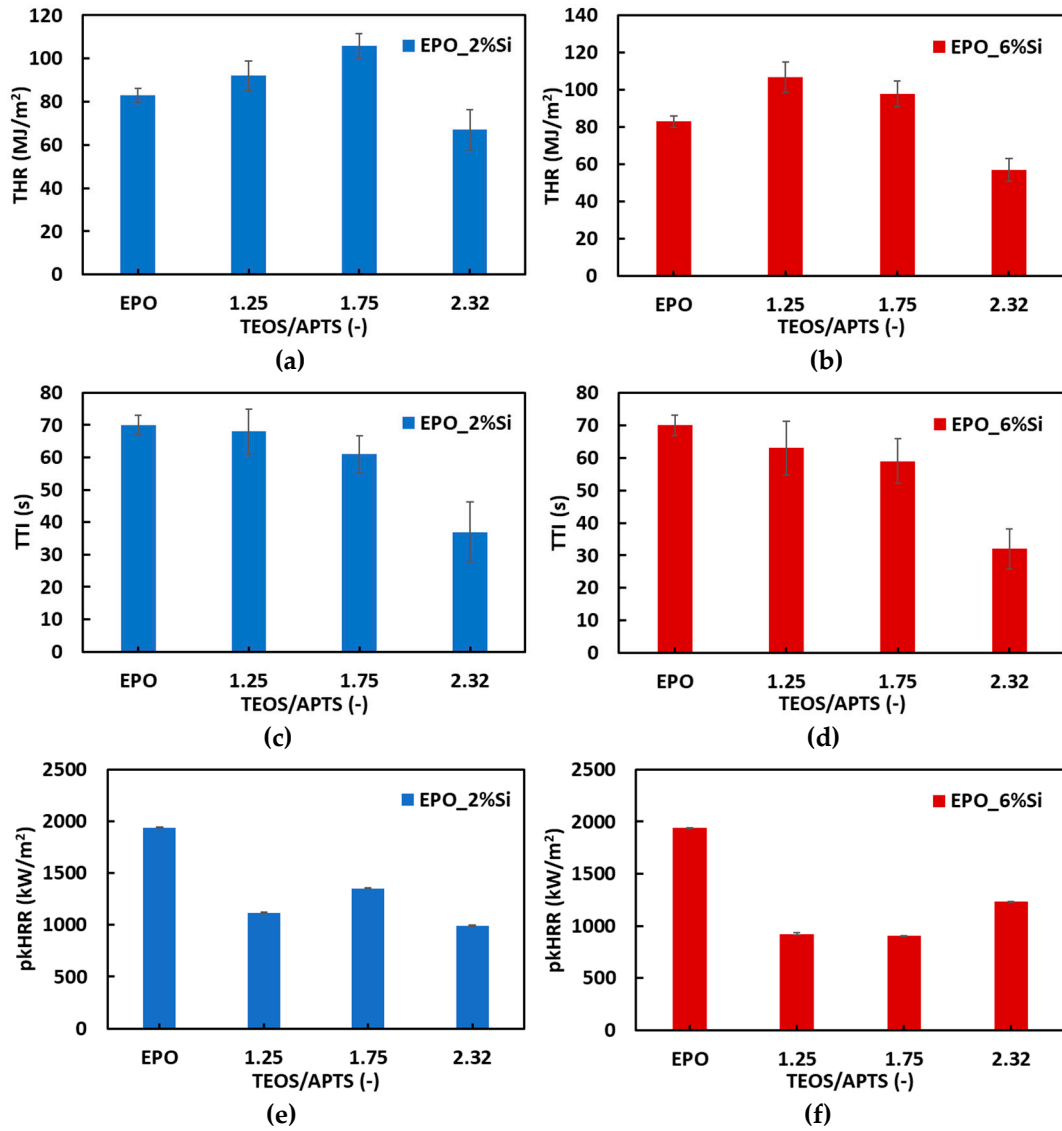

**Figure S3.** THR vs. TEOS/APTES molar ratio for the two investigated series containing (a) 2 wt.% of silica and (b) 6 wt.% of silica. TTI vs. TEOS/APTES molar ratio for the two investigated series containing (c) 2 wt.% of silica and (d) 6 wt.% of silica. pkHRR vs. TEOS/APTES molar ratio for the two investigated series containing (e) 2 wt.% of silica and (f) 6 wt.% of silica.
